# Supplementary material for: Impact of the Dynamic Change of Metabolic Health Status on the Incident Type 2 Diabetes: A Nationwide Population-Based Cohort Study
Source: PubMed Central journal article supplement — Endocrinol Metab (Seoul). 2019 Dec 23;34(4):406–14. doi: 10.3803/EnM.2019.34.4.406 (PMC6935776; doi:10.3803/enm.2019.34.4.406), 2019-12-23
Supplement: enm-34-406-s001.pdf [file enm-34-406-s001.pdf]

**Supplemental Table S1.** HR and 95% CI for the Incidence of Type 2 Diabetes According to Body Size Phenotype and Metabolic Stability: Sensitivity Analysis Excluding All Subjects with Fasting Plasma Glucose  $\geq 100$  mg/dL

| Variable      | Total     | Events | Follow-up duration, person-yr | Incidence rate, /1,000 person-yr | Adjusted HR (95% CI) |
|---------------|-----------|--------|-------------------------------|----------------------------------|----------------------|
| Stable MHNW   | 1,426,280 | 3,556  | 5,548,024                     | 0.64                             | 1 (reference)        |
| Unstable MHNW | 85,594    | 1,052  | 334,267                       | 3.15                             | 2.85 (2.66–3.06)     |
| Stable MHO    | 298,323   | 1,447  | 1,162,931                     | 1.24                             | 1.73 (1.63-1.84)     |
| Unstable MHO  | 72,221    | 1,080  | 281,312                       | 3.84                             | 4.23 (3.95-4.53)     |

Adjusted for age, sex, smoking, alcohol consumption, regular exercise, family history of type 2 diabetes, and mean fasting plasma glucose. HR, hazard ratio; CI, confidence interval; MHNW, metabolically healthy normal weight; MHO, metabolically healthy obese.
