# Supplementary material for: Impact of the Dynamic Change of Metabolic Health Status on the Incident Type 2 Diabetes: A Nationwide Population-Based Cohort Study
Source: PubMed Central journal article supplement — Endocrinol Metab (Seoul). 2019 Dec 23;34(4):406–14. doi: 10.3803/EnM.2019.34.4.406 (PMC6935776; doi:10.3803/enm.2019.34.4.406), 2019-12-23
Supplement: enm-34-406-s002.pdf [file enm-34-406-s002.pdf]

**Supplemental Table S2.** HR and 95% CI for the Incidence of Type 2 Diabetes According to Body Size Phenotype and Metabolic Stability: Sensitivity Analysis Excluding All Subjects with Cancer

| Variable      | Total     | Events | Follow-up duration, person-yr | Incidence rate, /1,000 person-yr | Adjusted HR (95% CI) |
|---------------|-----------|--------|-------------------------------|----------------------------------|----------------------|
| Stable MHNW   | 2,316,158 | 20,192 | 9,028,260                     | 2.24                             | 1 (reference)        |
| Unstable MHNW | 295,902   | 14,459 | 1,133,593                     | 12.76                            | 3.28 (3.21–3.36)     |
| Stable MHO    | 532,951   | 8,967  | 2,073,902                     | 4.32                             | 1.84 (1.79–1.88)     |
| Unstable MHO  | 244,566   | 15,253 | 928,779                       | 16.42                            | 4.78 (4.68–4.88)     |

Adjusted for age, sex, smoking, alcohol consumption, regular exercise, family history of type 2 diabetes, and mean fasting plasma glucose. HR, hazard ratio; CI, confidence interval; MHNW, metabolically healthy normal weight; MHO, metabolically healthy obese.
