# Supplementary material for: Impact of the Dynamic Change of Metabolic Health Status on the Incident Type 2 Diabetes: A Nationwide Population-Based Cohort Study
Source: PubMed Central journal article supplement — Endocrinol Metab (Seoul). 2019 Dec 23;34(4):406–14. doi: 10.3803/EnM.2019.34.4.406 (PMC6935776; doi:10.3803/enm.2019.34.4.406), 2019-12-23
Supplement: enm-34-406-s003.pdf [file enm-34-406-s003.pdf]

**Supplemental Table S3.** Multivariable Adjusted HR and 95% CI of Type 2 Diabetes in Subgroups in MHNW and MHO Group

| Variable                  | Stable MHNW (reference) vs. unstable MHNW |                          | Stable MHO (reference) vs. unstable MHO |                          |
|---------------------------|-------------------------------------------|--------------------------|-----------------------------------------|--------------------------|
|                           | HR (95% CI)                               | <i>P</i> for interaction | HR (95% C.I.)                           | <i>P</i> for interaction |
| Total                     | 3.11 (3.04–3.17)                          |                          | 2.68 (2.61–2.76)                        |                          |
| Age, yr                   |                                           | <0.001                   |                                         | <0.001                   |
| <65                       | 3.41 (3.34–3.50)                          |                          | 2.76 (2.69–2.84)                        |                          |
| ≥65                       | 1.83 (1.74–1.93)                          |                          | 1.96 (1.79–2.13)                        |                          |
| Sex                       |                                           | <0.001                   |                                         | <0.001                   |
| Men                       | 2.94 (2.86–3.02)                          |                          | 2.58 (2.50–2.67)                        |                          |
| Women                     | 3.46 (3.34–3.59)                          |                          | 3.05 (2.90–3.20)                        |                          |
| Weight change             |                                           | <0.001                   |                                         | <0.001                   |
| Weight loss (<–5%)        | 2.43 (2.28–2.60)                          |                          | 2.17 (2.01–2.33)                        |                          |
| Weight stable (–5% to 5%) | 3.08 (3.00–3.17)                          |                          | 2.59 (2.51–2.67)                        |                          |
| Weight gain (≥5%)         | 3.61 (3.45–3.78)                          |                          | 2.97 (2.77–3.19)                        |                          |

Adjusted for age, sex, smoking, alcohol consumption, regular exercise, family history of type 2 diabetes, and mean fasting plasma glucose. HR, hazard ratio; CI, confidence interval; MHNW, metabolically healthy normal weight; MHO, metabolically healthy obese.
